# Supplementary material for: Comparing video consultation with inperson assessment for Swedish patients with hard-to-heal ulcers: registry-based studies of healing time and of waiting time
Source: PubMed Central journal article supplement — BMJ Open. 2018 Feb 15;8(2):e017623. doi: 10.1136/bmjopen-2017-017623 (PMC5829745; doi:10.1136/bmjopen-2017-017623), 2018-02-15
Supplement: bmjopen-2017-017623.reviewer_comments.pdf [file bmjopen-2017-017623.reviewer_comments.pdf]

# BMJ Open

## Comparing video consultation with in-person assessment for Swedish patients with hard-to-heal ulcers: registry-based studies of healing time and of waiting time.

|                                 |                                                                                                                                                                                                                                                                                                                                                                                                                                                                           |
|---------------------------------|---------------------------------------------------------------------------------------------------------------------------------------------------------------------------------------------------------------------------------------------------------------------------------------------------------------------------------------------------------------------------------------------------------------------------------------------------------------------------|
| Journal:                        | <i>BMJ Open</i>                                                                                                                                                                                                                                                                                                                                                                                                                                                           |
| Manuscript ID                   | bmjopen-2017-017623.R1                                                                                                                                                                                                                                                                                                                                                                                                                                                    |
| Article Type:                   | Research                                                                                                                                                                                                                                                                                                                                                                                                                                                                  |
| Date Submitted by the Author:   | 31-Aug-2017                                                                                                                                                                                                                                                                                                                                                                                                                                                               |
| Complete List of Authors:       | Wickstrom, Hanna; Lund University, Clinical Sciences Malmo; Landstinget Blekinge, Blekinge Wound Healing Centre<br>Öien, Rut; Blekinge Wound Healing Center, Blekinge Centre of Competence<br>Fagerstrom, Cecilia; Blekinge Center of Competence, Department of Health and Caring Sciences<br>Anderberg, Peter; Blekinge Institute of Technology<br>Jakobsson, Ulf; Lund University, Clinical Sciences Malmo<br>Midlöv, Patrik ; Lund University, Clinical Sciences Malmo |
| <b>Primary Subject Heading</b>: | General practice / Family practice                                                                                                                                                                                                                                                                                                                                                                                                                                        |
| Secondary Subject Heading:      | Health services research, Communication                                                                                                                                                                                                                                                                                                                                                                                                                                   |
| Keywords:                       | eHealth, Telemedicine < BIOTECHNOLOGY & BIOINFORMATICS, Leg Ulcer, Registries, Wound Healing                                                                                                                                                                                                                                                                                                                                                                              |
|                                 |                                                                                                                                                                                                                                                                                                                                                                                                                                                                           |

SCHOLARONE™  
Manuscripts

only

**Title**

Comparing video consultation with in-person assessment for Swedish patients with hard-to-heal ulcers: registry-based studies of healing time and of waiting time.

**Authors**

Hanna Wickström, Rut F Öien, Cecilia Fagerström, Peter Anderberg, Ulf Jakobsson, Patrik Midlöv

**Corresponding author**

Wickström, Hanna Linnea

Lund University

Clinical Sciences Malmö

Jan Waldenströmsg 35

Malmö, SE 205 02

Sweden

hanna.wickstrom@med.lu.se

+46702728294

+46454733479

**Co-authors:**

Öien Rut Frank  
Blekinge Wound Healing  
Center  
Blekinge Centre of  
Competence  
Karlskrona  
Sweden

Anderberg Peter  
Blekinge Institute of  
Technology  
Karlskrona  
Sweden

Midlöv Patrik John  
Lund University  
Clinical Sciences Malmö  
Malmö  
Sweden

Fagerström Cecilia  
Blekinge Center  
of Competence  
Department of Health and  
Caring Sciences  
Karlskrona  
Sweden

Jakobsson Ulf  
Lund University  
Clinical Sciences Malmö  
Malmö  
Sweden

**Keywords:**

eHealth; Telemedicine; Leg Ulcer; Registries; Wound Healing

**Word count:**

3682

**Abstract**

**Objectives:** To investigate differences in ulcer healing time and waiting time between video consultation and in-person assessment for patients with hard-to-heal ulcers.

**Setting:** Patients treated at Blekinge Wound Healing Centre, a primary care centre covering the whole of Blekinge county (150 000 inhabitants), were compared with patients registered and treated according to the Registry for Ulcer Treatment (RUT), a Swedish national web-based quality registry.

**Participants:** In the study for analysing ulcer healing time, the study group consisted of 100 patients diagnosed through video consultation between October 2014 and September 2016. The control group for analysing healing time consisted of 1888 patients diagnosed through in-person assessment during the same period. In the study for analysing waiting time the same study group (n=100) was compared with 100 patients diagnosed through in-person assessment.

1  
2  
3 **Primary and secondary outcome measures:** Differences in ulcer healing time were  
4 analysed using the log-rank test. Differences in waiting time were analysed using Mann-  
5 Whitney U-test.  
6  
7

8  
9  
10 **Results:** Median healing time was 59 days in the study group and 82 days in the control group  
11 (p<0.001). Median waiting time was 25 days in the study group and 32 days for patients  
12 diagnosed through in-person assessment (p=0.017). There were no significant differences  
13 between the study group and the control group regarding gender, age, or ulcer size.  
14  
15  
16

17  
18  
19 **Conclusions:** Healing time and waiting time were significantly shorter for patients diagnosed  
20 through video consultation compared with those diagnosed through in-person assessment.  
21  
22  
23

## 24 25 26 27 **Strengths and limitations of this study**

- 28 • The use of a large, nationally representative sample of patients with hard-to-heal  
29 ulcers gives increased generalizability.
  - 30 • A well-known technical system was used for video communication.
  - 31 • All patients diagnosed through video consultation were assessed by the same GP,  
32 following standardized clinical routines for ulcer assessment.
  - 33 • The study group was consecutively included and rather limited in size (n=100).
- 34  
35  
36  
37  
38  
39  
40  
41  
42  
43  
44  
45  
46  
47

## 48 **Introduction**

49  
50  
51 Hard-to-heal ulcers are defined as ulcers which have not healed within 6 weeks<sup>1</sup>. Patients with  
52 these ulcers have long been considered neglected, as treatment is often given without  
53 diagnosis, thus prolonging ulcer healing time<sup>2</sup>. The majority of these patients are elderly and  
54  
55  
56  
57

1  
2  
3 suffer from other conditions such as diabetes and heart and lung diseases<sup>1,3</sup>. In addition to  
4 these comorbidities, these patients may experience extreme pain<sup>4,5</sup>. Treatment is carried out  
5 by different caregivers within different medical specialties, and so a multidisciplinary team of  
6 professionals is often necessary to establish the ulcer aetiology and provide the proper  
7 diagnosis<sup>6</sup>.  
8  
9  
10  
11  
12

13  
14  
15  
16  
17 In Sweden, the majority of patients with hard-to-heal ulcers are treated in primary care<sup>2,7</sup>.  
18 Dedicated wound healing centres in primary care are scarce, but Sweden does have a handful  
19 of such centres, including Blekinge Wound Healing Centre (BWHC), providing patient-  
20 centred care with a holistic approach. BWHC covers the whole of Blekinge county (150 000  
21 inhabitants). It is divided into two health care centres within the same clinical establishment,  
22 BWHC West and BWHC East, which are comparably organized in terms of patient  
23 population and staff. Both centres have the same expenditure of time for doctors'  
24 consultations and nurses' dressing changes, capacity for patient assessment and treatment, and  
25 facilities in terms of operating rooms, dressing materials, and computer services.  
26  
27  
28  
29  
30  
31  
32  
33  
34  
35  
36  
37  
38  
39

40 At BWHC, patients are treated according to a structured wound management based on a  
41 Swedish national quality registry, the Registry of Ulcer Treatment (RUT)<sup>7</sup>. The clinical  
42 routines provided by BWHC are the same as those provided by all the other units which  
43 register their patients in RUT, and so data from these other units are comparable with data  
44 from BWHC.  
45  
46  
47  
48  
49  
50  
51  
52  
53  
54  
55  
56  
57  
58  
59  
60

### **The Swedish Registry of Ulcer Treatment**

RUT is a web-based tool for clinical assessment of hard-to-heal ulcers, treatment strategies, and continuity of care. Solid clinical research data based on RUT has shown improved quality of life as well as reduction of healing time, treatment costs, and antibiotic treatment<sup>2, 8, 9</sup>.

There were more than 7000 registrations in RUT in 2016, giving a coverage rate of approximately 25% of all patients with hard-to-heal ulcers in Sweden.

Patients are registered by a nurse or physician on two occasions. The first registration includes variables for assessment of ulcer diagnosis and treatment strategies, while the second includes data on ulcer healing or negative clinical events such as amputation or death. Each patient with a non-healing ulcer remains in the registry until the follow-up is completed.

### **Telemedicine for wound management**

Telemedicine is the use of information technology and electronic communication to allow health care professionals to evaluate, diagnose, and treat patients at a distance. It typically includes various forms of video consultation or digital transmission of medical imaging and other clinical data.

Transmission of digital photographs has been used within ulcer care in Denmark since 2005, resulting in the reduction of waiting time, ulcer healing time, and transportation, the latter of which can often be uncomfortable or painful for the patient<sup>10</sup>. Another example is a telemedicine wound care model, which has produced reductions in both hospital admissions and patient transportations<sup>11</sup>. The use of three-dimensional images has shown high concordance with in-person consultation for assessment and measurement of wounds<sup>12</sup>.

1  
2  
3 Video communication is widely used within different medical specialties today, though  
4 thorough documentation and evaluation is insufficient<sup>13</sup>. However, there is a lack of use of  
5 this technology for ulcer care, even though its focus on the visual is considered ideal for  
6 wound management<sup>14</sup>. Video communication could be a useful tool, especially in primary  
7 care, where there is a need for national guidelines<sup>3</sup> as well as dedicated doctors and nurses for  
8 wound management.  
9  
10  
11  
12  
13  
14  
15  
16  
17

18 The aim of this study was to compare video consultation with in-person assessment for  
19 patients with hard-to-heal ulcers, in terms of healing time and waiting time.  
20  
21  
22  
23  
24  
25

## 26 **Methods**

### 27 **Study population and variables**

28  
29 The first study was an analysis of healing time for patients diagnosed through video  
30 consultation at BWHC West (study group) compared with patients diagnosed through in-  
31 person assessment based on data from RUT (control group) (Table 1).  
32  
33  
34  
35  
36  
37  
38  
39  
40

41 The second study was a supplementary analysis of the waiting time for a doctor's consultation  
42 for patients diagnosed through video consultation at BWHC West (study group) compared  
43 with patients diagnosed through in-person assessment at a comparable clinic (BWHC East)  
44 (Table 1). The reason this supplementary analysis was needed is that waiting time is not  
45 recorded in RUT.  
46  
47  
48  
49  
50  
51  
52  
53  
54  
55  
56  
57  
58  
59  
60

1  
2  
3 Hard-to-heal ulcers include different diagnostic groups such as venous, arterial and venous-  
4 arterial leg ulcers; neuropathic ulcers; pressure ulcers; traumatic ulcers; malignant ulcers;  
5 ulcers due to inflammatory vessel disease; and some ulcers of rare aetiology. This study  
6 included ulcers of any aetiology, severity, size, and duration. It is possible to register ulcers in  
7 RUT from the day they occur (day 0) if patients or staff believe that there will be a prolonged  
8 total healing time.  
9  
10  
11  
12  
13  
14  
15  
16  
17  
18

19 The number of patients in the study group was chosen according to the expected number of  
20 new undiagnosed patients seeking treatment at BWHC West and BWHC East, respectively,  
21 over two years.  
22  
23  
24  
25  
26  
27  
28  
29

30 Every patient in the study group (n=100) gave their written consent. Every patient in the  
31 control group (n=1888) gave their oral consent consistent with the principles of Swedish  
32 national quality registries.  
33  
34  
35  
36  
37  
38

39 **Table 1** Study population and setting  
40

|                     | Healing time study       |                         | Waiting time study       |                                   |
|---------------------|--------------------------|-------------------------|--------------------------|-----------------------------------|
| <b>Participants</b> | Study group<br>n=100     | Control group<br>n=1888 | Study group<br>n=100     | Patients at<br>BWHC East<br>n=100 |
| <b>Assessment</b>   | Video<br>consultation    | In-person<br>assessment | Video<br>consultation    | In-person<br>assessment           |
| <b>Setting</b>      | Patients at BWHC<br>West | Patients from<br>RUT    | Patients at BWHC<br>West | Patients at<br>BWHC East          |



|                           |                                                                               |                                                        |                                   |                                              |
|---------------------------|-------------------------------------------------------------------------------|--------------------------------------------------------|-----------------------------------|----------------------------------------------|
| <b>Inclusion</b>          | Consecutively included                                                        | All patients registered in RUT during the study period | Consecutively included            | Consecutively included                       |
| <b>Inclusion criteria</b> | Age >18; women and men; ulcers of any aetiology, severity, size, and duration |                                                        |                                   |                                              |
| <b>Exclusion criteria</b> | Age < 18<br>Patients with dementia                                            | Age <18<br>*                                           | Age <18<br>Patients with dementia | Age <18<br>*                                 |
| <b>Study period</b>       | 1 October 2014 – 30 September 2016                                            |                                                        |                                   |                                              |
| <b>Consent</b>            | Written consent mandatory                                                     | Oral consent according to Swedish registries           | Written consent mandatory         | Oral consent according to Swedish registries |

\* Patients in the control group (the registry) were included regardless of dementia status, since dementia is not recorded in the registry.

## The healing time study

### Study group

The patients were initially assessed during a nurse visit, with measurements taken according to RUT<sup>8</sup>. Ulcer size was measured by a planimeter. During this visit, the patient received an iPad programmed with Skype for the upcoming video consultation between the general practitioner at BWHC and the patient accompanied by the assigned nurse. All iPads had mobile internet access to avoid any need to use the patients' home Wi-Fi.

1  
2  
3 Each video consultation took place in the patient's home or in the primary health care centre.  
4  
5 During this consultation, the doctor established the ulcer diagnosis and an appropriate  
6  
7 treatment strategy which could be carried out by the assigned nurse under supervision. The  
8  
9 patient and the treatment strategy were followed up according to general clinical routines.  
10  
11 Documentation of the video consultation was transferred to the patient's medical record.  
12  
13  
14  
15  
16

17 Each patient was followed to ulcer healing or to the end of the study period, whichever  
18  
19 occurred first. If amputation or death occurred during the study period, the date of this event  
20  
21 was registered and the patient was not followed further.  
22  
23  
24  
25  
26

#### 27 Control group

28  
29 All patients were diagnosed by in-person consultation and registered in RUT. The same  
30  
31 measurements were used in both the control group and the study group, except for  
32  
33 measurement of ulcer size. For patients in the control group, this was done either by a  
34  
35 planimeter or as length multiplied by width, according to different clinical routines.  
36  
37  
38  
39  
40

41 As with the study group, each patient was followed to ulcer healing or the end of the study  
42  
43 period, and if amputation or death occurred, the date was registered and the patient was not  
44  
45 followed further.  
46  
47  
48  
49

#### 50 **The waiting time study**

51  
52  
53  
54  
55  
56  
57  
58  
59  
60

1  
2  
3 In Sweden, waiting time is considered clinically important as an indicator of cost effective  
4 health care. Age, gender, ulcer size, and ulcer duration were not considered to affect the  
5 waiting time for a doctor's consultation, and so were not analysed in this study.  
6  
7  
8  
9

### 10 11 12 13 Study group

14  
15 The same study group was used as for the healing time study.  
16  
17  
18  
19

### 20 Patients at BWHC East

21  
22 All patients with hard-to-heal ulcers were diagnosed by in-person assessment at BWHC East.  
23 These patients were likewise assessed according to RUT and followed to ulcer healing or to  
24 the end of the study period, whichever occurred first.  
25  
26  
27  
28  
29  
30  
31

### 32 Variables

33  
34 Age (years), gender, ulcer size (cm<sup>2</sup>), ulcer aetiology, and diabetes (yes or no) were analysed  
35 in both the study group and the control group. Ulcer size was measured by planimeter  
36 (Visitrak, manufactured in the UK for Smith & Nephew Medical Limited, Hull) or by length  
37 multiplied by width, according to the established routines in different registration units.  
38  
39  
40  
41  
42

43 Ulcers were categorized by diagnosis: venous ulcers, arterial ulcers, venous-arterial ulcers,  
44 pressure ulcers, neuropathic ulcers, traumatic ulcers, malignant ulcers, ulcers due to  
45 inflammatory vessel diseases such as vasculitis, and other ulcers.  
46  
47  
48  
49  
50  
51  
52

53 Ulcer duration (in days) was defined as the period from when the ulcer occurred to the date of  
54 diagnosis by a doctor.  
55  
56  
57  
58  
59  
60

1  
2  
3  
4  
5 Ulcer healing time (in days) was defined as the interval between the consultation with a  
6  
7 doctor and complete ulcer healing.  
8  
9

10  
11 Waiting time (in days) was defined as the interval between referral and consultation with a  
12  
13 doctor at the BWHC.  
14  
15

## 16 17 18 19 **Data analysis**

20  
21 Statistical analysis was performed using version 24 of IBM SPSS Statistics. Normally  
22  
23 distributed variables were expressed as mean values, standard deviations (SD), and ranges,  
24  
25 and compared using Student's t-test. Not normally distributed variables were expressed as  
26  
27 median values and ranges, and differences in groups were analysed using Mann-Whitney U-  
28  
29 test. Categorical variables were compared between groups using Pearson's Chi-square test.  
30  
31 Healing time was analysed with Kaplan-Meier curve. A log-rank test was used for equality of  
32  
33 survivor function. A Cox regression analysis was used to explore the effect of age, gender,  
34  
35 diabetes, ulcer size and ulcer duration on ulcer healing time. A p-value of less than 0.05 was  
36  
37 considered to indicate statistical significance.  
38  
39  
40  
41  
42  
43

## 44 **Results**

### 45 **Patient demographics**

46  
47 Basic data on the study group and the control group are presented in Table 2.  
48  
49  
50  
51

52  
53 The study group had a mean age of 77 years, the median ulcer size was 3.4 cm<sup>2</sup>, and the  
54  
55 median ulcer duration was 124 days. The control group had a mean age of 75 years, the  
56  
57

1  
2  
3 median ulcer size was 3.8 cm<sup>2</sup>, and the median ulcer duration was 84 days. In the study group  
4  
5 13% of the patients were registered as smokers, compared with 14% in the control group.  
6  
7  
8  
9

10 **Table 2.** Patient demographics: the healing time study.

|                                             | Study group                     | Control group                     | p-value |
|---------------------------------------------|---------------------------------|-----------------------------------|---------|
|                                             | n=100                           | n=1888                            |         |
| Age, mean (SD, range) <sup>A</sup>          | 77 years (13, 37-98)            | 75 years (14, 23–104)             | 0.231   |
| Female <sup>B</sup>                         | 54%                             | 56%                               | 0.744   |
| Diabetes <sup>B</sup>                       | 27%                             | 28%                               | 0.798   |
| Ulcer size, median (range) <sup>C</sup>     | 3.4 cm <sup>2</sup> (0.1-131.6) | 3.8 cm <sup>2</sup> (0.01-1196.0) | 0.192   |
| Ulcer duration, median (range) <sup>C</sup> | 124 days (7-3657)               | 84 days (0-5839)                  | <0.001  |
| Healing time, median (95% CI) <sup>D</sup>  | 59 days (40-78)                 | 82 days (75-89)                   | <0.001  |

28 <sup>A</sup> Student's t-test

29 <sup>B</sup> Chi-square test

30 <sup>C</sup> Mann-Whitney U-test

31 <sup>D</sup> Log-rank test

32  
33  
34  
35  
36  
37  
38 There was no significant difference in gender, age, ulcer size, or diabetes between the patients  
39  
40 in the study group and the patients in the control group (Table 2).  
41  
42  
43

44 In both the study group and the control group, 71% (70.8% and 71.3% respectively) of the  
45  
46 ulcers were smaller than 10cm<sup>2</sup> and the remaining 29% (29.2% and 28.7% respectively) were  
47  
48 larger than 10 cm<sup>2</sup>. The Mann-Whitney U-test showed no significant difference in ulcer size  
49  
50 between the study group and the control group when analysing only the small ulcers  
51  
52 (p=0.053) or only the larger ulcers (p=0.132).  
53  
54  
55  
56  
57  
58  
59  
60

There was a significant difference in ulcer duration between the study group and the control group ( $p < 0.001$ ), with the shortest ulcer duration seen in the control group (Table 2).

The aetiology of the ulcers is presented in Table 3. A Chi-square test was performed concerning the difference in ulcer aetiology between the groups, but the analysis showed that the groups were too small for a comparison.

**Table 3** Ulcer aetiology (%)

|                             | Study group<br>n=100 | Control group<br>n=1888 |
|-----------------------------|----------------------|-------------------------|
| Venous ulcer                | 37                   | 35                      |
| Arterial ulcer              | 19                   | 8                       |
| Venous-arterial ulcer       | 8                    | 5                       |
| Pressure ulcer              | 16                   | 14                      |
| Neuropathic ulcer           | 6                    | 4                       |
| Traumatic ulcer             | 11                   | 14                      |
| Malignant ulcer             | 1                    | 1                       |
| Inflammatory vessel disease | 0                    | 1                       |
| Other                       | 2                    | 9                       |
| Missing                     | 0                    | 9                       |

### Healing time

The flowchart in Figure 1 illustrates the outcome for the participants in the healing time study.

Healing rate was 82% (n=82) in the study group and 52% (n=978) in the control group.

1  
2  
3 **Figure 1** Flow of participants through the trial.  
4  
5  
6  
7

8 After censorship of unhealed ulcers, deaths, and amputations, the median healing time was 59  
9 days (mean: 78 days; 95% CI: 40-78) in the study group and 82 days (mean: 118 days; 95%  
10 CI: 75-89) in the control group ( $p < 0.001$ ; Table 2). Cox regression analysis showed that there  
11 was no significant influence of gender, age, ulcer size, diabetes or ulcer duration on healing  
12 time.  
13  
14  
15  
16  
17  
18  
19  
20  
21  
22

23 The healing time and healing rate are illustrated in Figure 2 using Kaplan-Meier analysis,  
24 again censored for unhealed ulcers, deaths, and amputations and also adjusted for age, gender,  
25 diabetes, ulcer size and ulcer duration.  
26  
27  
28  
29  
30  
31  
32

33 **Figure 2** Healing rate and ulcer healing time for the study group compared with the control group. Figure  
34 adjusted for age, gender, diabetes, ulcer size and ulcer duration.  
35  
36  
37  
38

### 39 **Waiting time**

40 The median waiting time was 25 days (mean: 25 days; range: 1–83 days) in the study group  
41 and 32 days (mean: 43 days; range: 3–294 days) for the patients at BWHC East. There was a  
42 significant difference in waiting time between the groups ( $p = 0.017$ ), with the shortest waiting  
43 time seen in the study group (Figure 3).  
44  
45  
46  
47  
48  
49  
50  
51  
52

53 **Figure 3** Waiting time for a doctor's consultation for patients in the study group compared with patients at  
54 BWHC East.  
55  
56  
57  
58  
59  
60

## Discussion

The main finding in this study was the significantly reduced ulcer healing time for patients with hard-to-heal ulcers diagnosed by video consultation (59 days) compared with patients diagnosed by in-person assessment (82 days). We also found that the waiting time was significantly reduced for patients diagnosed by video consultation (25 days) compared with patients diagnosed by in-person consultation (32 days). This study focused on ulcer healing time, as earlier research has shown that reduced ulcer healing time results in improved quality of life, less pain, lower treatment costs, and less time spent on transportation<sup>4, 13</sup>.

In the study group, the ulcer duration before diagnosis was 124 days and healing time was 59 days, while the corresponding figures in the control group were 84 days and 82 days respectively. One explanation for this could be that the patients in the study group lived in remote and mostly rural areas, and could not easily reach the health care centre for assessment of the ulcer. The video consultation made it possible to reach these patients who might have been undiagnosed and without adequate treatment for a long time. Nevertheless, a reduced ulcer healing time was found in the study group, despite the longer ulcer duration, which could demonstrate the importance of a short waiting time.

In clinical practice in Sweden, the main technique for measuring ulcer size is multiplication of length by width, while in specialized clinics such as BWHC, staff use digital planimetry to measure ulcer size. The use of these different measurement techniques is one limitation of this study, but earlier researchers<sup>15</sup> have noted that the two methods have a high degree of



1  
2  
3 agreement with each other for ulcers with an area of up to approximately 10 cm<sup>2</sup>. In this  
4  
5 study, most patients (71%) had an ulcer area smaller than 10 cm<sup>2</sup>, and we found no significant  
6  
7 difference in ulcer size in the proportion of smaller ulcers between the study group and the  
8  
9 control group. We therefore consider that the use of the two different techniques for  
10  
11 measuring ulcer size could be justifiable in this setting. The remaining 29% of the ulcers were  
12  
13 larger than 10 cm<sup>2</sup>, but even for these larger ulcers we found no significant difference in ulcer  
14  
15 size between the study group and the control group.  
16  
17  
18  
19  
20

21  
22 The health care system has a strong economic incentive to reduce patients' waiting time. In  
23  
24 the industrialized world, costs for wound management consume about 2-4% of the annual  
25  
26 expenditure on health care, and these costs will rise in the future because of longer life  
27  
28 expectancy and a larger proportion of patients with diabetes<sup>3</sup>. A recent study<sup>9</sup> found that staff  
29  
30 costs accounted for 87% of the total costs for wound management. Reduced waiting and  
31  
32 healing times<sup>16, 17</sup> are strongly related to reduced costs. We did not analyse the number of  
33  
34 nurse visits before and after the video consultation, but there were no changes in the clinical  
35  
36 routines and so we can assume that the frequencies of dressing changes were not altered.  
37  
38  
39  
40  
41

42  
43 Previous studies have shown that telemedicine using digital images provides rapid diagnosis  
44  
45 and ulcer care due to reduced waiting time<sup>10, 18</sup>. We found that this is also true for real-time  
46  
47 video consultation, which has not previously been studied thoroughly. Video consultation  
48  
49 seems to be an effective tool to shorten waiting time. One perspective is the more efficient use  
50  
51 of the operating room. As the doctor does not need any facilities other than a tablet and  
52  
53 internet access to carry out the video consultation, the operating room is freed up for other  
54  
55 patients to undergo dressing changes at the same time, thus increasing the number of patients  
56  
57  
58  
59  
60

1  
2  
3 diagnosed and treated per day. The lack of requirement for specialist equipment also means  
4  
5 that the doctor is independent of any specific health care centre.  
6  
7  
8  
9

10  
11 The healing rate in the study group was 82%, compared with 52% in the control group. The  
12  
13 figure of 82% is in line with earlier reports of a healing rate of 81% in 24 weeks<sup>19</sup> and 83% in  
14  
15 30 weeks<sup>20</sup>. The lower healing rate in the registry (i.e. in the control group) could be  
16  
17 explained by a possible delay in follow-up data being added to the registry. The difficulty of  
18  
19 obtaining follow-up data in a timely fashion is a well-known phenomenon for most Swedish  
20  
21 quality registries.  
22  
23  
24  
25  
26

27  
28 Video consultation could be more accessible and suitable for patients with hard-to-heal ulcers  
29  
30 who are unable to attend clinical visits due to other medical conditions, pain, disability, or  
31  
32 reduced mobility<sup>1, 4, 5</sup>, as well as being an alternative for patients who are abroad. Our results  
33  
34 indicate that video consultation can effectively transmit sufficient ulcer data to allow a remote  
35  
36 specialist in wound care to establish diagnosis and an ideal treatment strategy. This is in line  
37  
38 with an earlier study<sup>21</sup> of diabetic foot ulcers, which showed no prolonged healing time when  
39  
40 comparing telemedical assessment with in-person clinic visits. Concordance of the  
41  
42 telemedicine consultation with in-person assessment was also found when a three-  
43  
44 dimensional camera was used in a study of diabetic foot ulcers<sup>12</sup>. Video consultation provides  
45  
46 a useful communication tool, allowing the specialist wound team to support and educate the  
47  
48 assigned nurses in primary care and community care in an easy and secure manner. This could  
49  
50 be compared with an earlier study<sup>22</sup> which showed that telemedicine could effectively  
51  
52 transmit sufficient wound data to allow a remote specialist in wound care to provide support  
53  
54 to local health professionals working in nursing homes. Telemedicine has also been shown to  
55  
56  
57  
58  
59  
60

1  
2  
3 be a useful communication tool in a home care setting<sup>23</sup>. The modern technique of video  
4 communication through iPad or smartphone is easy to use and is now widely available in both  
5  
6 rural and urban societies.  
7  
8  
9

10  
11  
12 RUT covers wound management in primary care, community care, private care, and in-patient  
13 hospital care throughout Sweden, and provides a validated tool for diagnosis and follow-up,  
14 meaning that the dataset is large and reliable. One challenge for GPs and nurses in primary  
15 care in Sweden is to provide adequate diagnosis and treatment to each patient with a hard-to-  
16 heal ulcer in this unselected patient group. RUT was developed in order to deal with this  
17 issue, and hence includes hard-to-heal ulcers of any aetiology even when there are different  
18 healing trajectories. An earlier study found that departments which registered their patients in  
19 RUT reported reduced ulcer healing times after the introduction of the registry<sup>2</sup>. Patients not  
20 registered in RUT thus probably have a longer ulcer healing time. If the results from our study  
21 were to be compared with unregistered patients, the difference in healing time would be even  
22 more marked, making our findings somewhat understated.  
23  
24  
25  
26  
27  
28  
29  
30  
31  
32  
33  
34  
35  
36  
37  
38  
39

40 The GP in charge of the BWHC is the first author of this study (HWI), which could be  
41 considered a bias and a possible explanation for the lower dropout frequency in the study  
42 group. However, it could be considered a strength that all patients diagnosed through video  
43 consultation were assessed by the same GP following standardized clinical routines for ulcer  
44 assessment. One limitation is the lack of blinded outcome assessment, but a register-based  
45 study gives the opportunity to analyse large study populations, which is hard to accomplish  
46 with blinded outcome studies. Another limitation is the exclusion of patients with dementia in  
47 the study group, which was done as recommended by the Ethical Review Board. There is a  
48  
49  
50  
51  
52  
53  
54  
55  
56  
57  
58  
59  
60

1  
2  
3 need for future studies which focus on patient and staff perceptions of the new technology, the  
4 patient's quality of life, and cost savings for the health care system. Further well-designed  
5  
6 randomized controlled studies are necessary to understand how best to deploy telemedicine  
7  
8 services in ulcer treatment.  
9

10  
11  
12  
13  
14  
15 In Sweden, RUT stands for a structured wound management and a way to document the  
16  
17 wound healing process. Video consultation is one complementary communication tool, which  
18  
19 together with RUT allows an easy ulcer assessment, especially for patients who are unable to  
20  
21 attend clinical visits due to severe medical conditions, pain, disability, or reduced mobility.  
22  
23 Video consultation in parallel with the clinical practice in RUT seems to lead to a more  
24  
25 efficient use of resources when reducing healing time and waiting time for this neglected  
26  
27 patient group.  
28  
29  
30  
31  
32  
33

## 34 **Conclusion**

35  
36  
37 The findings from this study illustrate the possible impact of video consultation with a doctor  
38  
39 for patients with hard-to-heal ulcers, resulting in significantly reduced healing time and  
40  
41 waiting time. Using video consultation as a complement to in-person assessment has the  
42  
43 potential to improve ulcer diagnosis, treatment, and healing.  
44  
45  
46  
47  
48  
49

## 50 **Acknowledgements**

51  
52 The authors wish to thank registered nurse Charlotta Prahl and assistant nurse Anna Davnert  
53  
54 at Blekinge Wound Healing Centre.  
55  
56  
57  
58  
59  
60

## References

1. Nelzén O, Bergqvist D, Lindhagen A, et al. Chronic leg ulcers: an underestimated problem in primary health care among elderly patients. *J Epidemiol Community Health* 1991;45:184-7.
2. Oien RF, Forssell H. Ulcer healing time and antibiotic treatment before and after the introduction of the Registry of Ulcer Treatment: an improvement project in a national quality registry in Sweden. *BMJ Open* 2013;3:e003091.
3. Swedish Council on Health Technology Assessment (SBU). Chronic Ulcers in the Elderly – Prevention and Treatment. Stockholm; 2014 Aug. SBU Yellow Report No. 226.
4. Akesson N, Oien RF, Forssell H, et al. Ulcer pain in patients with venous leg ulcers related to antibiotic treatment and compression therapy. *Br J Community Nurs* 2014;19 (Suppl 9):S6-S13.
5. Hellstrom A, Nilsson C, Nilsson A, et al. Leg ulcers in older people: a national study addressing variation in diagnosis, pain and sleep disturbance. *BMC Geriatrics* 2016;16:25.
6. Mooij MC, Huisman LC. Chronic leg ulcer: does a patient always get a correct diagnosis and adequate treatment? *Phlebology* 2016;31 (Suppl 1):68-73.
7. Registry of Ulcer Treatment (RUT). [www.rut-europe.eu](http://www.rut-europe.eu).
8. Oien RF, Ragnarson Tennvall G. Accurate diagnosis and effective treatment of leg ulcers reduce prevalence, care time and costs. *J Wound Care* 2006;15:259-62.
9. Oien RF, Forssell H, Ragnarson Tennvall G. Cost consequences due to reduced ulcer healing times – analyses based on the Swedish Registry of Ulcer Treatment. *Int Wound J* 2015;13:957-62.

- 1  
2  
3 10. Jelnes R. Telemedicine in the management of patients with chronic wounds. *J Wound*  
4  
5 *Care* 2011;20:187-90.  
6
- 7  
8 11. Sood A, Granick MS, Trial C, et al. The role of telemedicine in wound care: a review and  
9  
10 analysis of a database of 5,795 patients from a mobile wound-healing center in Languedoc-  
11  
12 Roussillon, France. *Plast Reconstr Surg* 2016;138 (Suppl 3):248S-256S.  
13
- 14  
15 12. Bowling FL, King L, Paterson JA, et al. Remote assessment of diabetic foot ulcers using a  
16  
17 novel wound imaging system. *Wound Repair Regen* 2011;19:25-30.  
18
- 19  
20 13. Nordheim LV, Haavind MT, Iversen MM. Effect of telemedicine follow-up care of leg  
21  
22 and foot ulcers: a systematic review. *BMC Health Serv Res* 2014;14:565. doi:  
23  
24 10.1186/s12913-014-0565-6.  
25
- 26  
27 14. Chittoria RK. Telemedicine for wound management. *Indian J Plast Surg* 2012;45:412-7.  
28
- 29  
30 15. Oien RF, Håkansson A, Hansen BU, et al. Measuring the size of ulcers by planimetry: a  
31  
32 useful method in the clinical setting. *J Wound Care* 2002;11:165-8.  
33
- 34  
35 16. Petursson P. GPs' reasons for "non-pharmacological" prescribing of antibiotics: a  
36  
37 phenomenological study. *Scand J Prim Health Care* 2005;23:120-5  
38
- 39  
40 17. Vowden K, Vowden P, Posnett J. The resource costs of wound management in Bradford  
41  
42 and airedale primary care trust in the UK. *J Wound Care* 2009;18:93-4.  
43
- 44  
45 18. Chanussot-Deprez C, Contreras-Ruiz J. Telemedicine in wound care. *Int Wound J*  
46  
47 2008;5:651-4.  
48
- 49  
50 19. Moffatt CJ, Franks PJ, Oldroyd M, et al. Community clinics for leg ulcers and impact on  
51  
52 healing. *BMJ* 1992;305:1389-92.  
53  
54  
55  
56  
57  
58  
59  
60

1  
2  
3 20. Rybak Z, Franks PJ, Krasowski G, et al. Strategy for the treatment of chronic leg wounds:  
4 a new model in Poland. *Int Angiol* 2012;31:550-6.  
5  
6

7  
8 21. Rasmussen BS, Froekjaer J, Bjerregaard MR, et al. A randomized controlled trial  
9 comparing telemedical and standard outpatient monitoring of diabetic foot ulcers. *Diabetes*  
10 *Care* 2015;38:1723-9.  
11  
12

13  
14  
15 22. Vowden K, Vowden P. A pilot study on the potential of remote support to enhance wound  
16 care for nursing-home patients. *J Wound Care* 2013;22:481-8.  
17  
18

19  
20 23. Terry M, Halstead LS, O'Hare P, et al. Feasibility study of home care wound management  
21 using telemedicine. *Adv Skin Wound Care* 2009;22:358-64.  
22  
23  
24  
25  
26  
27

28 **Contributors:** Hanna Wickström led the research project and played the main role in the  
29 research design and initial manuscript. Rut Öien contributed to the research design and  
30 provided knowledge of RUT. Ulf Jakobsson contributed to the data analysis and interpretation  
31 of results. Patrik Midlöv, Cecilia Fagerström, and Peter Anderberg contributed to the research  
32 design. All authors reviewed and revised the manuscript.  
33  
34  
35  
36  
37  
38  
39  
40  
41  
42

43 **Funding:** The study was partly funded by the Scientific Committee of Blekinge County  
44 Council's Research and Development Foundation as part of a PhD studentship.  
45  
46  
47  
48  
49  
50

51 **Competing interests:** None  
52  
53  
54  
55  
56  
57  
58  
59  
60

1  
2  
3  
4  
5  
6  
7  
8  
9  
10  
11  
12  
13  
14  
15  
16  
17  
18  
19  
20  
21  
22  
23  
24  
25  
26  
27  
28  
29  
30  
31  
32  
33  
34  
35  
36  
37  
38  
39  
40  
41  
42  
43  
44  
45  
46  
47  
48  
49  
50  
51  
52  
53  
54  
55  
56  
57  
58  
59  
60

**Ethics approval:** The study was approved by the Regional Ethical Review Board of Lund, Sweden (ref: 2014/228).

**Data sharing statement:** No additional data available.

For peer review only



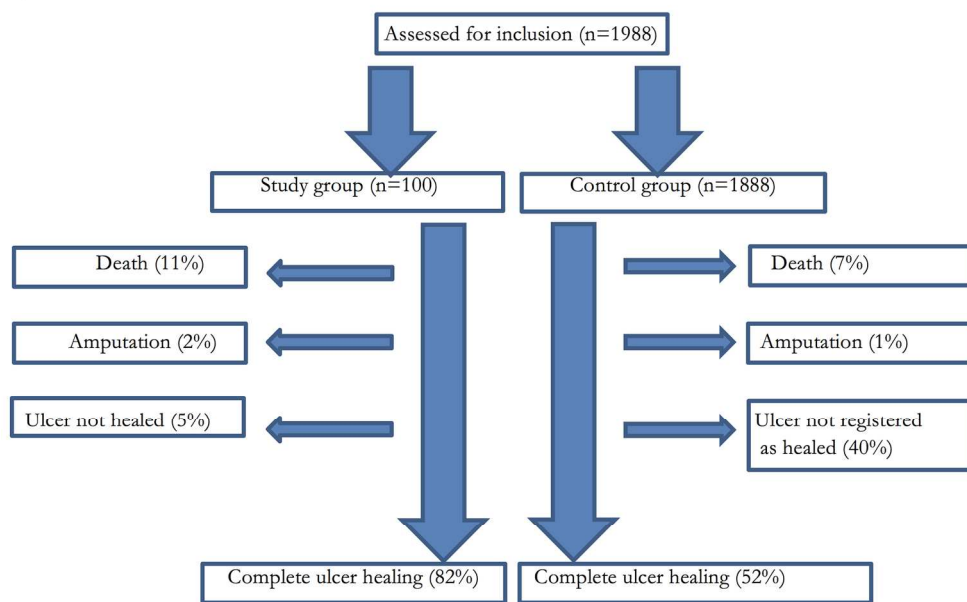

**Figure 1** Flow of participants through the trial.

173x110mm (300 x 300 DPI)

1  
2  
3  
4  
5  
6  
7  
8  
9  
10  
11  
12  
13  
14  
15  
16  
17  
18  
19  
20  
21  
22  
23  
24  
25  
26  
27  
28  
29  
30  
31  
32  
33  
34  
35  
36  
37  
38  
39  
40  
41  
42  
43  
44  
45  
46  
47  
48  
49  
50  
51  
52  
53  
54  
55  
56  
57  
58  
59  
60

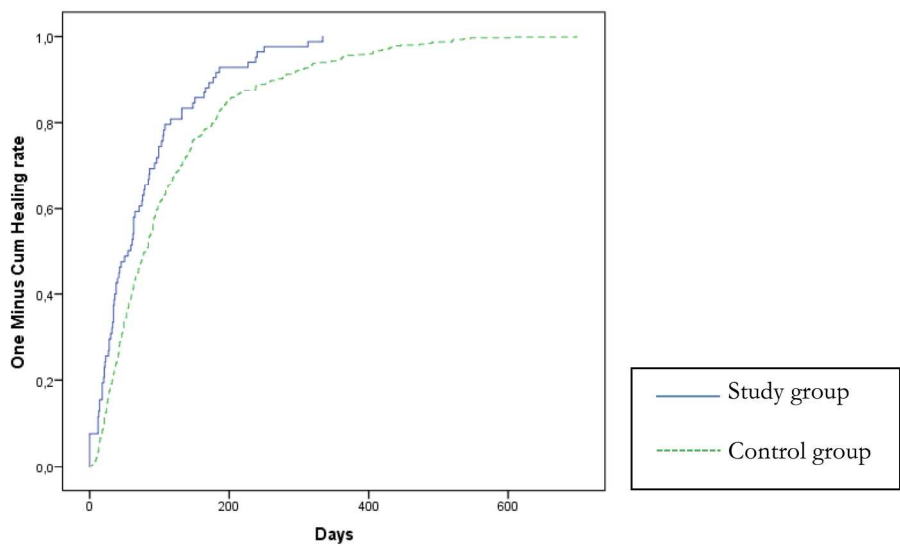

**Figure 2** Healing rate and ulcer healing time for the study group compared with the control group. Figure adjusted for age, gender, diabetes, ulcer size and ulcer duration.

222x125mm (300 x 300 DPI)

Review only

1  
2  
3  
4  
5  
6  
7  
8  
9  
10  
11  
12  
13  
14  
15  
16  
17  
18  
19  
20  
21  
22  
23  
24  
25  
26  
27  
28  
29  
30  
31  
32  
33  
34  
35  
36  
37  
38  
39  
40  
41  
42  
43  
44  
45  
46  
47  
48  
49  
50  
51  
52  
53  
54  
55  
56  
57  
58  
59  
60

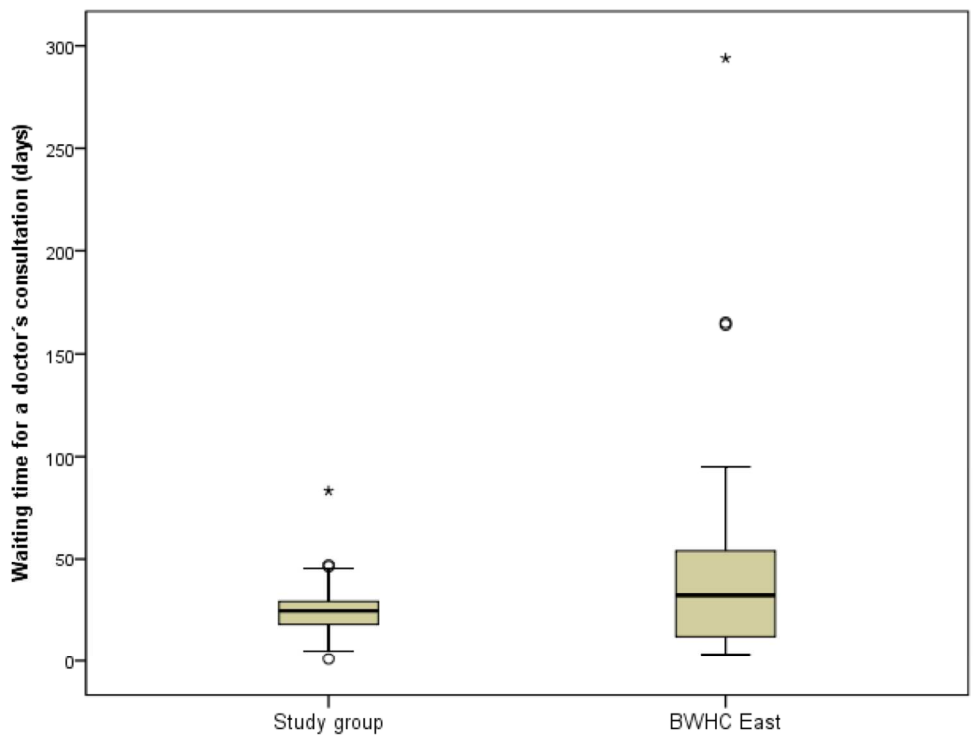

**Figure 3** Waiting time for a doctor's consultation for patients in the study group compared with patients at BWHC East.

250x188mm (300 x 300 DPI)

View Only

**STROBE 2007 (v4) Statement—Checklist of items that should be included in reports of *case-control studies***

| Section/Topic             | Item # | Recommendation                                                                                                                                                                       | Reported on page #              |
|---------------------------|--------|--------------------------------------------------------------------------------------------------------------------------------------------------------------------------------------|---------------------------------|
| Title and abstract        | 1      | (a) Indicate the study’s design with a commonly used term in the title or the abstract                                                                                               | 1, 2, 3                         |
|                           |        | (b) Provide in the abstract an informative and balanced summary of what was done and what was found                                                                                  | 2, 3                            |
| <b>Introduction</b>       |        |                                                                                                                                                                                      |                                 |
| Background/rationale      | 2      | Explain the scientific background and rationale for the investigation being reported                                                                                                 | 3-6                             |
| Objectives                | 3      | State specific objectives, including any prespecified hypotheses                                                                                                                     | 6                               |
| <b>Methods</b>            |        |                                                                                                                                                                                      |                                 |
| Study design              | 4      | Present key elements of study design early in the paper                                                                                                                              | 6-8                             |
| Setting                   | 5      | Describe the setting, locations, and relevant dates, including periods of recruitment, exposure, follow-up, and data collection                                                      | 7-8                             |
| Participants              | 6      | (a) Give the eligibility criteria, and the sources and methods of case ascertainment and control selection. Give the rationale for the choice of cases and controls                  | 7-9                             |
|                           |        | (b) For matched studies, give matching criteria and the number of controls per case                                                                                                  | Not relevant                    |
| Variables                 | 7      | Clearly define all outcomes, exposures, predictors, potential confounders, and effect modifiers. Give diagnostic criteria, if applicable                                             | 9-10                            |
| Data sources/ measurement | 8*     | For each variable of interest, give sources of data and details of methods of assessment (measurement). Describe comparability of assessment methods if there is more than one group | 9-10                            |
| Bias                      | 9      | Describe any efforts to address potential sources of bias                                                                                                                            | 17                              |
| Study size                | 10     | Explain how the study size was arrived at                                                                                                                                            | 7                               |
| Quantitative variables    | 11     | Explain how quantitative variables were handled in the analyses. If applicable, describe which groupings were chosen and why                                                         | 10                              |
| Statistical methods       | 12     | (a) Describe all statistical methods, including those used to control for confounding                                                                                                | 10                              |
|                           |        | (b) Describe any methods used to examine subgroups and interactions                                                                                                                  | 10                              |
|                           |        | © Explain how missing data were addressed                                                                                                                                            | 12 Flow chart – no missing data |
|                           |        | (d) If applicable, explain how matching of cases and controls was addressed                                                                                                          | Not relevant                    |
|                           |        | (e) Describe any sensitivity analyses                                                                                                                                                | Not relevant                    |
| <b>Results</b>            |        |                                                                                                                                                                                      |                                 |

|                   |     |                                                                                                                                                                                                              |                                                                                                                                                                                         |
|-------------------|-----|--------------------------------------------------------------------------------------------------------------------------------------------------------------------------------------------------------------|-----------------------------------------------------------------------------------------------------------------------------------------------------------------------------------------|
| Participants      | 13* | (a) Report numbers of individuals at each stage of study—eg numbers potentially eligible, examined for eligibility, confirmed eligible, included in the study, completing follow-up, and analysed            | 12 Flow chart                                                                                                                                                                           |
|                   |     | (b) Give reasons for non-participation at each stage                                                                                                                                                         | 7-8<br>Consecutively included in the study group = no missing data, see Flow chart page 12;<br>Data from RUT shows healed ulcers why there were no missing data relevant for this study |
|                   |     | (c) Consider use of a flow diagram                                                                                                                                                                           | 12                                                                                                                                                                                      |
| Descriptive data  | 14* | (a) Give characteristics of study participants (eg demographic, clinical, social) and information on exposures and potential confounders                                                                     | 11-12                                                                                                                                                                                   |
|                   |     | (b) Indicate number of participants with missing data for each variable of interest                                                                                                                          | No missing data in the study group                                                                                                                                                      |
| Outcome data      | 15* | Report numbers in each exposure category, or summary measures of exposure                                                                                                                                    | 12-13                                                                                                                                                                                   |
| Main results      | 16  | (a) Give unadjusted estimates and, if applicable, confounder-adjusted estimates and their precision (eg, 95% confidence interval). Make clear which confounders were adjusted for and why they were included | 11-13                                                                                                                                                                                   |
|                   |     | (b) Report category boundaries when continuous variables were categorized                                                                                                                                    | 11-13                                                                                                                                                                                   |
|                   |     | (c) If relevant, consider translating estimates of relative risk into absolute risk for a meaningful time period                                                                                             | Not relevant                                                                                                                                                                            |
| Other analyses    | 17  | Report other analyses done—eg analyses of subgroups and interactions, and sensitivity analyses                                                                                                               | 11-13                                                                                                                                                                                   |
| <b>Discussion</b> |     |                                                                                                                                                                                                              |                                                                                                                                                                                         |
| Key results       | 18  | Summarise key results with reference to study objectives                                                                                                                                                     | 13                                                                                                                                                                                      |
| Limitations       | 19  | Discuss limitations of the study, taking into account sources of potential bias or imprecision.<br>Discuss both direction and magnitude of any potential bias                                                | 17                                                                                                                                                                                      |

1  
2  
3  
4  
5  
6  
7  
8  
9  
10  
11  
12  
13  
14  
15  
16  
17  
18  
19  
20  
21  
22  
23  
24  
25  
26  
27  
28  
29  
30  
31  
32  
33  
34  
35  
36  
37  
38  
39  
40  
41  
42  
43  
44  
45  
46  
47

|                          |    |                                                                                                                                                                            |       |
|--------------------------|----|----------------------------------------------------------------------------------------------------------------------------------------------------------------------------|-------|
| Interpretation           | 20 | Give a cautious overall interpretation of results considering objectives, limitations, multiplicity of analyses, results from similar studies, and other relevant evidence | 14-16 |
| Generalisability         | 21 | Discuss the generalisability (external validity) of the study results                                                                                                      | 16    |
| <b>Other information</b> |    |                                                                                                                                                                            |       |
| Funding                  | 22 | Give the source of funding and the role of the funders for the present study and, if applicable, for the original study on which the present article is based              | 21    |

\*Give information separately for cases and controls in case-control studies and, if applicable, for exposed and unexposed groups in cohort and cross-sectional studies.

**Note:** An Explanation and Elaboration article discusses each checklist item and gives methodological background and published examples of transparent reporting. The STROBE checklist is best used in conjunction with this article (freely available on the Web sites of PLoS Medicine at <http://www.plosmedicine.org/>, Annals of Internal Medicine at <http://www.annals.org/>, and Epidemiology at <http://www.epidem.com/>). Information on the STROBE Initiative is available at [www.strobe-statement.org](http://www.strobe-statement.org).
